# Supplementary material for: Implications of considering metal bioavailability in estimates of freshwater ecotoxicity: examination of two case studies
Source: Springer Nature journal article supplement (doi:10.1007/s11367-011-0317-3), 2011-07-12
Supplement: MOESM1 [file 5817344]

electronic supplementary material

**Implications of considering metal bioavailability in estimates of freshwater ecotoxicity: Examination of two case studies**

**Nilima Gandhi • Miriam L. Diamond • Mark A. J. Huijbregts • Jeroen B. Guinée • Willie J. G. M. Peijnenburg • and Dik van de Meent**

N. Gandhi ()

Department of Chemical Engineering and Applied Chemistry, University of Toronto, Toronto, Canada

M. L. Diamond ()

Department of Geography, University of Toronto, 100 St. George Street, Toronto, Ontario, Canada M5S 3G3, Canada

e-mail: [miriam.diamond@utoronto.ca](mailto:miriam.diamond@utoronto.ca)

M. A. J. Huigbregts • D. van de Meent

Department of Environmental Science, Faculty of Science, Radboud University, Nijmegen, The Netherlands

J. B. Guinée • W. J. G. M. Peijnenburg

Institute of Environmental Sciences, Leiden University, Leiden, The Netherlands

W. J. G. M. Peijnenburg • D. van de Meent

Laboratory of Environmental Risk Assessment, National Institute of Public Health and the Environment (RIVM), Bilthoven, The Netherlands

() **Corresponding author:**

Tel.: +1 416 978 1586

Fax: +1 416 946 5992

e-mail: [miriam.diamond@utoronto.ca](mailto:miriam.diamond@utoronto.ca)

**Table S1** LCI data for 1 kg of copper pipe with emission estimates by the processing stage (source: Gloria et al. 2006)

**Table S2** LCI data for zinc gutter system reported by Gloria et al. (2006; original source: Eggels et al. 2000)

**Table S3** Defaultmodel parameter values required for the calculation of metal CFs as reported in the original USES-LCA 1.0, USES-LCA 2.0 and USEtoxTM (see details in Table 1)

| **Metal** | **USES-LCA 1.0** | | | **USES-LCA 2.0** | | | **USEtoxTM** | | |
| --- | --- | --- | --- | --- | --- | --- | --- | --- | --- |
| **LogKd (L/kg)** | **Diss Fr (-)** | **PNEC**  **(mg/L)** | **LogKd**  **(L/kg)** | **Diss Fr (-)** | **HC50**  **(mg/L)** | **LogKd**  **(L/kg)** | **Diss Fr (-)** | **HC50**  **(mg/L)** |
| Ag | - | - | - | 5.0 | 0.40 | 2.5E-02 | 5.0 | 0.41 | 7.7E-02 |
| Cu | 4.7 | 0.44 | 1.1E-03 | 4.7 | 0.57 | 1.6E-01 | 4.7 | 0.33 | 4.4E-01 |
| Cd | 5.1 | 0.24 | 3.4E-04 | 5.1 | 0.34 | 8.6E-01 | 4.9 | 0.45 | 1.9E+00 |
| Co | 3.6 | 0.91 | 2.6E-03 | 3.6 | 0.95 | 4.0E+00 | 4.6 | 0.59 | 2.0E+00 |
| Cr (III) | 5.5 | 0.12 | 3.4E-02 | 5.5 | 0.19 | 3.9E+00 | 4.6 | 0.59 | 7.9E+00 |
| Cr (VI) | 5.5 | 0.12 | 8.5E-03 | 5.5 | 0.19 | 3.9E+00 | 5.1 | 0.35 | 8.5E+00 |
| Ni | 3.9 | 0.83 | 1.8E-03 | 3.9 | 0.89 | 8.8E-01 | 4.2 | 0.81 | 1.4E+00 |
| Hg | 5.2 | 0.19 | 2.3E-04 | 5.2 | 0.28 | 6.3E-02 | 4.4 | 0.73 | 3.2E+00 |
| Pb | 5.8 | 0.058 | 1.1E-02 | 5.8 | 0.094 | 3.8E+00 | 5.3 | 0.19 | 3.1E-01 |
| Zn | 5.0 | 0.27 | 6.6E-03 | 5.0 | 0.38 | 1.2E+00 | 2.7 | 0.61 | 7.5E+00 |

**Table S4** Ambient chemistry for freshwater archetypes used to calculate CFs of metals using the new framework proposed by Gandhi et al. (2010)

| **Freshwater** | **Category** | | | **Example Ecosystem** | **pH** | **DOC** | **Hardness** | **Ca** | **Mg** | **Na** | **K** | **SO4** | **Cl** |
| --- | --- | --- | --- | --- | --- | --- | --- | --- | --- | --- | --- | --- | --- |
| **archetypes** | **pH** | **DOC** | **Hardness** |  |  | **mg/L** | **mgCaCO3/L** | **mg/L** | **mg/L** | **mg/L** | **mg/L** | **mg/L** | **mg/L** |
| **Archetype 1** | High | Med | High | Canals, large & small lakes | 8.1 | 8.4 | 221 | 56.6 | 19.5 | 65.8 | 0.1 | 67 | 120 |
| **Archetype 2** | High | Med | Med | Mole, United Kingdom | 7.6 | 6.1 | 132 | 42.48 | 6.22 | 26.67 | 3.52 | 48.03 | 32.97 |
| **Archetype 3** | High | Low | Med | Segrino, Italy | 8.2 | 1.7 | 169 | 58.51 | 5.59 | 2.60 | 0.78 | 9.61 | 20.92 |
| **Archetype 4** | Med | High | Med | Ankeveen, Netherlands | 7.3 | 17.8 | 165 | 52.10 | 8.58 | 11.79 | 0.82 | 109.51 | 20.21 |
| **Archetype 5** | Med | Low | Med | Small springs | 6.7 | 2.2 | 78 | 20.3 | 6.7 | 17 | 0.1 | 67 | 31 |
| **Archetype 6** | Med | Low | Low | Somerain, Belgium | 6.4 | 1.6 | 28 | 6.69 | 2.65 | 7.20 | 2.82 | 85.50 | 5.99 |
| **Archetype 7** | Low | Med | Low | Bihain, Belgium | 5.9 | 8.9 | 10 | 2.48 | 0.95 | 6.39 | 1.80 | 2.88 | 8.37 |

**Table S5** Estimatedmetal bioavailable fractions (BFs, dimensionless), LogKd (L/kg) and average chronic toxicity (HC50; mg/L) values corrected for the speciation of metals in various freshwater archetypes used in the analysis of USEtox(new) method as discussed in Table 1

**Table S6** Therelative importance of metals (in an increasing order) based on the numerical ranking of estimated CFs towards the freshwater ecotoxicity in LCIA

| **USES-LCA1** | | **USES-LCA2** | | **USEtoxTM** | **USEtox(new)** | | | | | |  |
| --- | --- | --- | --- | --- | --- | --- | --- | --- | --- | --- | --- |
| **Infinite** | **100 Yrs** | **Infinite** | **100 Yrs** | Arche type-1 | Arche type-2 | Arche type-3 | Arche type-4 | Arche type-5 | Arche type-6 | Arche type-7 |
| Pb | Pb | Pb | Pb | Pb | Pb | Pb | Pb | Pb | Pb | Pb | Pb |
| Zn | Zn | Zn | Zn | Co | Cu | Cu | Zn | Cu | Cu | Co | Zn |
| Cu | Cu | Cd | Cd | Cd | Zn | Zn | Cu | Zn | Co | Zn | Cu |
| Cd | Cd | Co | Co | Ni | Ni | Ni | Ni | Ni | Zn | Cu | Co |
| Ni | Ni | Ni | Ni | Zn | Co | Co | Co | Co | Ni | Ni | Ni |
| Co | Co | Cu | Cu | Cu | Cd | Cd | Cd | Cd | Cd | Cd | Cd |

**Table S7** Literature derived ranges and geometric averages of measured chronic toxicity test data, expressed as total dissolved concentration, for metals considered in the case studies

| **Metal** | **Range-EC50 (µg/L)** | **Geomean-EC50 (µg/L)** | **Data Source** |
| --- | --- | --- | --- |
| Cd | 2.1 - 1900 | 17 | EU Risk Assessment Report |
| Co | 21.7 - 5050 | 250 | Bill Stubblefield & co-workers |
| Cu | 1.1 - 320 | 58 | EU Risk Assessment Report |
| Pb | 7.6 - 1685 | 106 | Martin Grosell & co-workers |
| Ni | 3.3 - 4138 | 187 | EU Risk Assessment Report |
| Zn | 0.1 - 2050 | 216 | EU Risk Assessment Report |

**Table S8** Relative ranking in the order of low to high ecotoxicity potential for organic chemicals and metals based on the CFs calculated using each model. Note that CFs for the organics used in the relative ranking of USEtoxTM(new) approach are from USEtoxTM(previous)

**Fig. S1**  Total estimated metal emission (kg) that will eventually end up in the freshwater compartment due to the release of metals to air and water during the processing of Cu pipe considered in the case study

**Fig. S2**  Total estimated metal emission (kg) that will reach the freshwater compartment due to the release of metals to air and water in the case study of Zn gutter system
